# Supplementary material for: Weighing the Risk: A Scoping Review on the relationship between Obesity and Glioma
Source: Research Square preprint supplement (doi:10.21203/rs.3.rs-7568408/v1), 2025-09-15

**Figure 1** - PRISMA for the relationship between Obesity and Glioma. A scoping review from Google Scholar, ScienceDirect and PubMed. PRISMA chart adapted from Moher et al. 2009 (**17**).


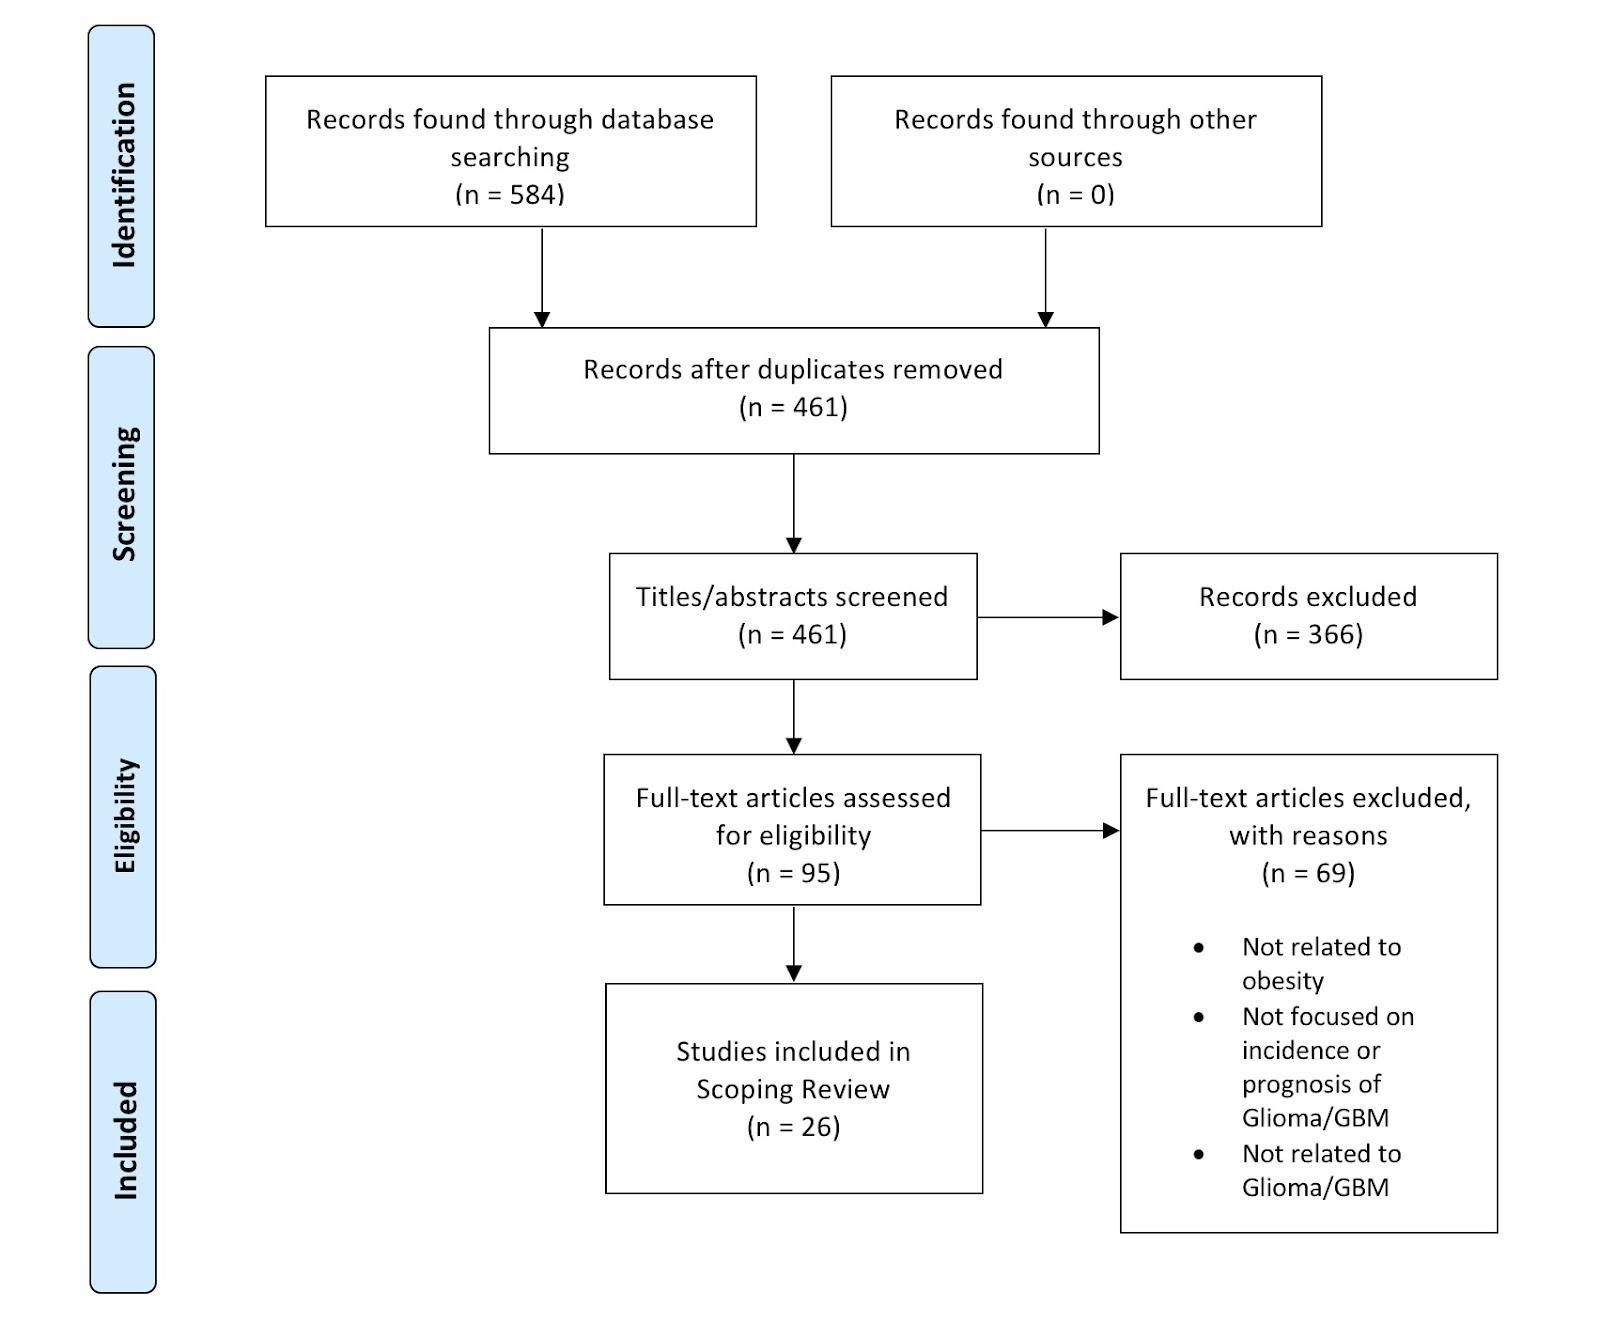

Supplement: Supplementary file 1 [file 11cfc119c61a718f1e60aa1b.docx]
